# Supplementary material for: The role of zinc in the stability of the marginally stable IscU scaffold protein
Source: PubMed Central journal article supplement (PMC4243993; doi:10.1002/pro.2501), 2014-06-11

## Suppl. Materials

**Figure S1** - System preparation. Truncated models of holo IscU\_wt used in DFT calculations. Hydrogen atoms were added to compensate the valence of the truncated atoms.

**Figure S2** - Location of the BCPs as respect to the atomic positions of the truncated models of IscU\_wt and its mutants as in Figure 5 but assuming protonated cysteines. Top two panels: His105 of IscU\_wt is assumed uncharged (left) and charged (right); Middle panels: the same for IscU\_D39A. Lower panel left: IscU\_H105A. Lower panel right: IscU\_D39A\_H105A. BCPs are shown as small red spheres. Zn, S, O, C, H, and N atoms are shown as white, yellow, red, black, grey, and blue spheres respectively.

**Figure S3** – Effect of  $Zn^{2+}$  on the NMR HSQC spectrum of IscU\_wt as in Figure 6D but in the presence of 150 mM NaCl. From top to bottom: Spectra of EDTA pre-treated IscU\_wt, titrated with 1:1 and 5:1  $Zn^{2+}$ : protein molar equivalents.

**Table S1.** Geometric parameters of the coordination site in zinc loaded IscU with all Cys protonated. The distances were taken from the structures optimized at the detailed QM/MM computational level. Numbering is according to Figure S1.

|                              | Wt<br>(H105 <sup>+</sup> ) | Wt<br>(H105 <sup>0</sup> ) | D39A <sup>a</sup><br>(H105 <sup>+</sup> ) | D39A <sup>a</sup><br>(H105 <sup>0</sup> ) | H105A | D39A_H105A |
|------------------------------|----------------------------|----------------------------|-------------------------------------------|-------------------------------------------|-------|------------|
| <b>Distances (Å)</b>         |                            |                            |                                           |                                           |       |            |
| Zn-S(5)                      | 2.604                      | 4.252                      | 2.484                                     | 2.633                                     | 2.974 | 2.495      |
| Zn-S(7)                      | 2.554                      | 2.493                      | 2.468                                     | 2.560                                     | 2.509 | 2.521      |
| Zn-O(12)                     | 2.092                      | 2.045                      | --                                        | --                                        | 2.023 | --         |
| Zn-O(13)                     | 2.108                      | 2.113                      | --                                        | --                                        | 2.203 | --         |
| Zn-S(10)                     | 2.746                      | 4.081                      | 2.467                                     | 2.582                                     | 2.580 | 2.489      |
| Zn-N(9)                      | 8.184                      | 2.065                      | 9.293                                     | 2.054                                     | --    | --         |
| SH(5)-O(12)                  | 4.488                      | 2.954                      | --                                        | --                                        | 2.459 | --         |
| SH(10)-O(13)                 | 2.608                      | 2.348                      | --                                        | --                                        | 2.269 | --         |
| <b>Angles (deg)</b>          |                            |                            |                                           |                                           |       |            |
| O(12)-HS(5)-S(5)             | 42.6                       | 151.0                      | --                                        | --                                        | 118.6 | --         |
| O(13)-HS(10)-S(10)           | 120.4                      | 143.8                      | --                                        | --                                        | 121.4 | --         |
| O(13)-HS(7)-S(7)             | 33.1                       | 143.8                      | --                                        | --                                        | --    | --         |
| S(7)-Zn-N(7)                 | 144.1                      | 110.6                      | --                                        | 136.15                                    | --    | --         |
| O(12)-Zn-O(13)               | 62.73                      | 63.6                       | --                                        | --                                        | 62.2  | --         |
| <b>Dihedral Angles (deg)</b> |                            |                            |                                           |                                           |       |            |
| S(7)-N(9)-O(13)-O(12)        | 87.1                       | 84.9                       | --                                        | --                                        | --    | --         |
| S(5)-S(7)-Zn-S(10)           | 116.9                      | --                         | 150.9                                     | --                                        | --    | 156.19     |
| S(7)-N(9)-S(10)-S(5)         | -5.6                       | --                         | --                                        | 51.5                                      | --    | --         |
| S(7)-S(10)-O(13)-O(12)       | 117.9                      | --                         | --                                        | --                                        | 88.2  | --         |

**Table S2.** Geometric parameters of the coordination site in zinc loaded IscU when all Cys are deprotonated. The distances were taken from the structures optimized at the detailed QM/MM computational level. Numbering is according to Figure S1.

|                              | Wt<br>(H105 <sup>+</sup> ) | Wt<br>(H105 <sup>0</sup> ) | D39A <sup>a</sup><br>(H105 <sup>+</sup> ) | D39A <sup>a</sup><br>(H105 <sup>0</sup> ) | H105A | D39A_H105A |
|------------------------------|----------------------------|----------------------------|-------------------------------------------|-------------------------------------------|-------|------------|
| <b>Distances (Å)</b>         |                            |                            |                                           |                                           |       |            |
| Zn-S(5)                      | 2.396                      | 5.706                      | 2.389                                     | 2.518                                     | 2.585 | 2.419      |
| Zn-S(7)                      | 2.372                      | 2.392                      | 2.319                                     | 2.419                                     | 2.484 | 2.391      |
| Zn-O(12)                     | 2.202                      | 2.050                      | --                                        | --                                        | 2.095 | --         |
| Zn-O(13)                     | 2.241                      | 2.997                      | --                                        | --                                        | 2.982 | --         |
| Zn-S(10)                     | 4.826                      | 2.414                      | 2.479                                     | 2.485                                     | 2.541 | 2.405      |
| Zn-N(9)                      | 7.623                      | 2.211                      | 4.422                                     | 2.351                                     | --    | --         |
| <b>Angles (deg)</b>          |                            |                            |                                           |                                           |       |            |
| S(5)-Zn-S(7)                 | 121.2                      | 73.3                       | 126.2                                     | 101.1                                     | 96.3  | 107.1      |
| N(9)-Zn-O(12)                | 81.9                       | 93.5                       | --                                        | --                                        | --    | --         |
| N(9)-Zn-S(10)                | 47.0                       | 92.2                       | 44.0                                      | 86.06                                     | --    | --         |
| S(7)-Zn-N(9)                 | 146.7                      | 105.4                      | 62.8                                      | 117.5                                     | --    | --         |
| O(12)-Zn-O(13)               | 59.6                       | 48.1                       | --                                        | --                                        | 48.6  | --         |
| <b>Dihedral Angles (deg)</b> |                            |                            |                                           |                                           |       |            |
| S(7)-N(9)-O(13)-O(12)        | 102.1                      | 120.5                      | --                                        | --                                        | --    | --         |
| S(5)-S(7)-Zn-S(10)           | 115.4                      | 146.5                      | 153.6                                     | -171.9                                    | 130.5 | 165.6      |
| S(7)-Zn-N(9)-S(10)           | 10.0                       | 141.8                      | 34.2                                      | 111.5                                     | --    | --         |
| N(9)-Zn-O(12)-O(13)          | 41.3                       | 168.8                      | --                                        | --                                        | --    | --         |

**Table S3.** Electron density at the bond critical points [ $\rho(r_c)$  (au)] of IscU as calculated assuming protonated cysteines. BCP were derived from the wave function calculated at the SMD-B3LYP/6-311++G\*\* computational level.

| BCP                 |                            |                            |                                           |                                           |       |            |
|---------------------|----------------------------|----------------------------|-------------------------------------------|-------------------------------------------|-------|------------|
|                     | Wt<br>(H105 <sup>+</sup> ) | Wt<br>(H105 <sup>0</sup> ) | D39A <sup>a</sup><br>(H105 <sup>+</sup> ) | D39A <sup>a</sup><br>(H105 <sup>0</sup> ) | H105A | D39A_H105A |
| <b>Zn-S(5)</b>      | 0.041                      | --                         | 0.051                                     | 0.035                                     | 0.017 | 0.049      |
| <b>Zn-S(7)</b>      | 0.046                      | 0.050                      | 0.055                                     | 0.045                                     | 0.050 | 0.049      |
| <b>Zn-O(12)</b>     | 0.064                      | 0.069                      | --                                        | --                                        | 0.073 | --         |
| <b>Zn-O(13)</b>     | 0.061                      | 0.058                      | --                                        | --                                        | 0.049 | --         |
| <b>Zn-N(9)</b>      | --                         | 0.074                      | --                                        | 0.076                                     | --    | --         |
| <b>Zn-S(10)</b>     | 0.030                      | --                         | 0.055                                     | 0.044                                     | 0.044 | 0.053      |
| <b>SH(5)-O(12)</b>  | --                         | 0.003                      | --                                        | --                                        | 0.010 | --         |
| <b>SH(10)-O(13)</b> | --                         | 0.011                      | --                                        | --                                        | 0.016 | --         |

**Table S4.** Electron density at the bond critical points [ $\rho(r_c)$  (au)] of IscU as calculated assuming deprotonated cysteines. BCP were derived from the wave function calculated at the SMD-B3LYP/6-311++G\*\* computational level.

| BCP                            |                            |                            |                                           |                                           |       |            |
|--------------------------------|----------------------------|----------------------------|-------------------------------------------|-------------------------------------------|-------|------------|
|                                | Wt<br>(H105 <sup>+</sup> ) | Wt<br>(H105 <sup>0</sup> ) | D39A <sup>a</sup><br>(H105 <sup>+</sup> ) | D39A <sup>a</sup><br>(H105 <sup>0</sup> ) | H105A | D39A_H105A |
| <b>Zn-S(5)</b>                 | 0.062                      | --                         | 0.061                                     | 0.046                                     | 0.042 | 0.056      |
| <b>Zn-S(7)</b>                 | 0.065                      | 0.063                      | 0.071                                     | 0.059                                     | 0.053 | 0.062      |
| <b>Zn-O(12)</b>                | 0.049                      | 0.067                      | --                                        | --                                        | 0.061 | --         |
| <b>Zn-O(13)</b>                | 0.045                      | --                         | --                                        | --                                        | --    | --         |
| <b>Zn-N(9)</b>                 | --                         | 0.054                      | --                                        | 0.040                                     | --    | --         |
| <b>Zn-S(10)</b>                | --                         | 0.058                      | 0.054                                     | 0.054                                     | 0.048 | 0.062      |
| <b>S(10)-O(13)</b>             | 0.004                      | --                         | --                                        | --                                        | --    | --         |
| <b>S(10)-NH<sup>+</sup>(9)</b> | --                         | --                         | 0.053                                     | --                                        | --    | --         |

Figure S1

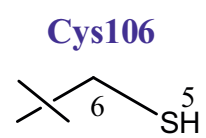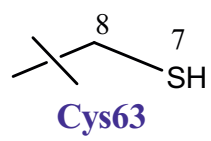

**Zn**

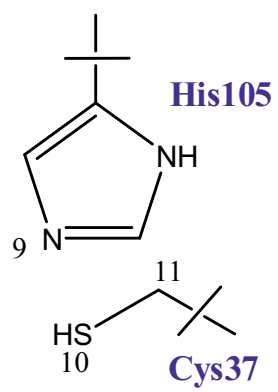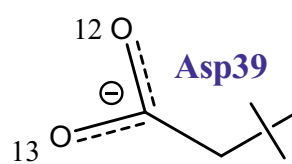

Figure S2

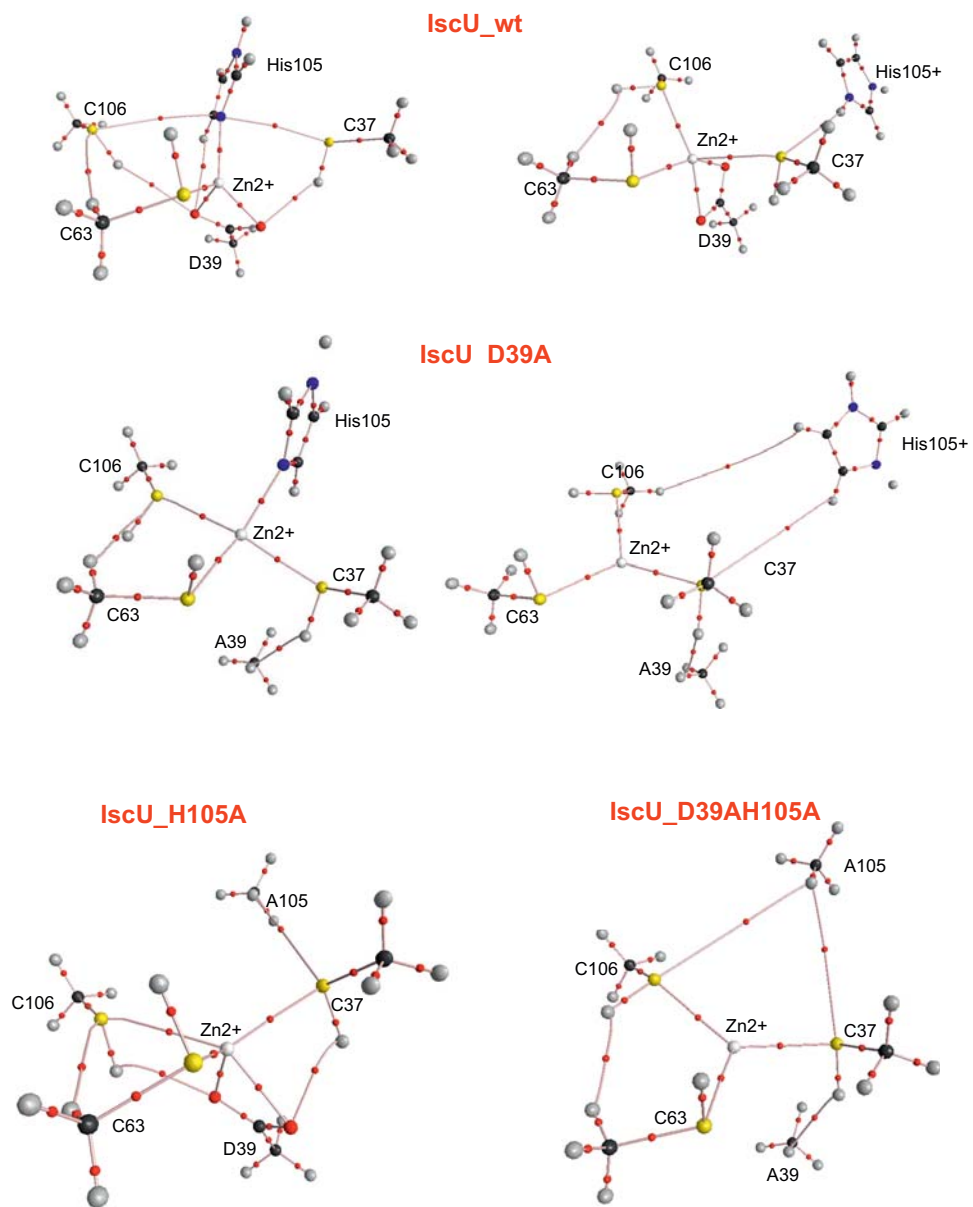

Figure S3

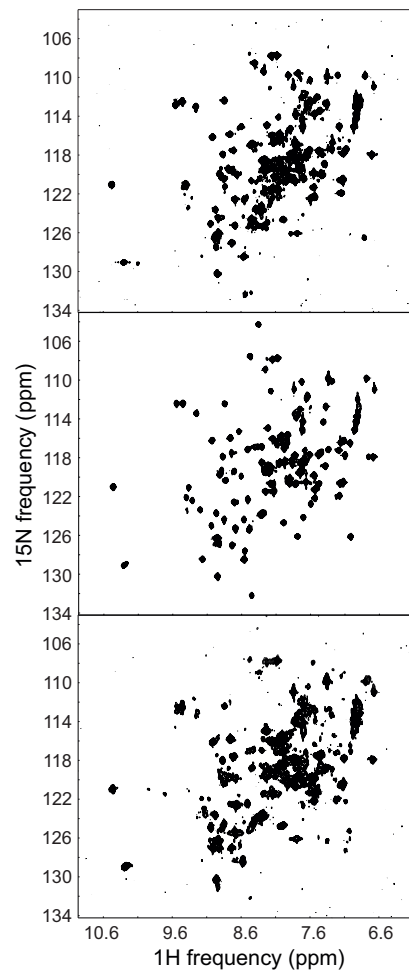

Supplement: pro0023-1208-sd1.pdf [file pro0023-1208-sd1.pdf]
